# Supplementary material for: A Review on Anti-Inflammatory Activity of Monoterpenes
Source: Molecules. 2013 Jan 18;18(1):1227–54. doi: 10.3390/molecules18011227 (PMC6269770; doi:10.3390/molecules18011227)
Supplement: Supplementary file 1 [file molecules-18-01227-s001.pdf]

**Table S1.** Monoterpenes chemical structures with anti-inflammatory activity.

|                                                                                                                 | Experimental protocol                                          | Anti-inflammatory activity and/or mechanism                      | Animal tested | Reference  |
|-----------------------------------------------------------------------------------------------------------------|----------------------------------------------------------------|------------------------------------------------------------------|---------------|------------|
| 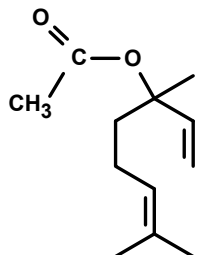 <p><b>Linalyl acetate</b></p> | In vitro assay with blood mononuclear cells                    | Immunomodulation<br>NKCA lymphocyte activation (CD69 expression) | Human         | [6]        |
| 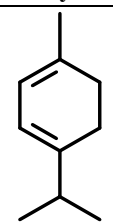 <p><b>α-Terpinene</b></p>     | Popliteal lymph node assay                                     | Immunostimulatory activity                                       | Rat           | [7]        |
|                                                                                                                 | COX-2 assay                                                    | Inhibition of COX-2 activity                                     | Ovine         | [79]       |
| 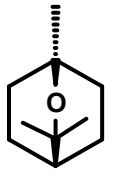 <p><b>1,8-Cineole</b></p>    | Carrageenan-induced paw edema; Cotton pellet-induced granuloma | Reduced paw edema;<br>Reduced granuloma tissue weight            | Wistar rat    | [13]       |
|                                                                                                                 | TNBS-induced colitis                                           | Reduced MPO activity                                             | Wistar rat    | [17,19,20] |
|                                                                                                                 | Bronchial asthma patients                                      | Mucolytic and steroid-saving effect                              | Human         | [21]       |
|                                                                                                                 | IL-1β and LPS-stimulated mediator production                   | Reduced TNF-α, IL-1β, LTB4, tromboxane B2 and PGE2 production    | Human         | [22]       |

Table S1. Cont.

|                                                                                                         | Experimental protocol                                                        | Anti-inflammatory activity and/or mechanism                                                                                                                                                                  | Animal tested | Reference |
|---------------------------------------------------------------------------------------------------------|------------------------------------------------------------------------------|--------------------------------------------------------------------------------------------------------------------------------------------------------------------------------------------------------------|---------------|-----------|
| 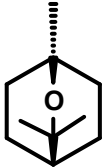<br><b>1,8-Cineole</b> | Lymphocytes;<br>LPS-stimulated monocytes                                     | Reduced TNF- $\alpha$ , IL-1 $\beta$ , IL-4, IL-5, IL-6 and IL-8 production                                                                                                                                  | Human         | [23]      |
|                                                                                                         | OVA-sensitization                                                            | Reduced airway inflammation;<br>Reduced TNF- $\alpha$ and IL-1 $\beta$ production; Reduced MPO activity in BALF                                                                                              | Guinea pig    | [24]      |
|                                                                                                         | <i>Gardnerella vaginalis</i> —induced vaginosis;<br>Vulvovaginal candidiasis | Reduced number of <i>G. vaginalis</i> and <i>Candida albicans</i> ;<br>Reduced MPO activity;<br>Reduced TNF- $\alpha$ , IL-1 $\beta$ , IL-6, COX-2, iNOS and NF-kB activation;<br>Increased IL-10 expression | Mice          | [27]      |
|                                                                                                         | TCDD-induced toxicity                                                        | Elimination of TCDD-induced immune suppressive effects;<br>Reduced CD8+;<br>Increased CD3+, CD4+, CD161+, CD4+CD25+ and total lymphocytes                                                                    | Rat           | [29]      |
| 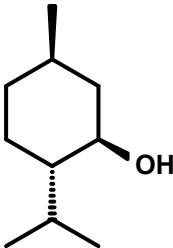<br><b>l-Menthol</b>   | LPS-stimulated monocytes                                                     | Reduced IL-1 $\beta$ , LTB <sub>4</sub> , and PGE <sub>2</sub> production                                                                                                                                    | Human         | [15]      |
|                                                                                                         | PCA-model                                                                    | Anti-allergic rhinitis                                                                                                                                                                                       | Guinea pig    | [30]      |
|                                                                                                         | Type I allergic reaction                                                     | Reduced histamine release                                                                                                                                                                                    | Rat mast cell | [31]      |

Table S1. Cont.

|                                                                                                    | Experimental protocol                          | Anti-inflammatory activity and/or mechanism                           | Animal tested      | Reference |
|----------------------------------------------------------------------------------------------------|------------------------------------------------|-----------------------------------------------------------------------|--------------------|-----------|
| 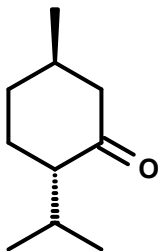<br>Menthone      | PCA-model                                      | Anti-allergic rhinitis                                                | Guinea pig         | [30]      |
|                                                                                                    | Type I allergic reaction                       | Reduced histamine release                                             | Rat mast cell      | [31]      |
| 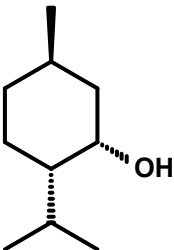<br>Neomenthol    | Type I allergic reaction                       | Reduced histamine release                                             | Rat mast cell      | [31]      |
| 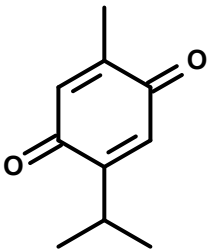<br>Thymoquinone | OVA-sensitization                              | Reduced production of PGD2, COX-2, IL-4, IL-5, IL-13, IgE and IgG1    | Balb/c mice        | [37,43]   |
|                                                                                                    | Freund's incomplete adjuvant-induced arthritis | Reduced TNF- $\alpha$ and IL-1 $\beta$ production                     | Sprague-Dawley rat | [46]      |
|                                                                                                    | STZ-induced gestational diabetes               | Increased IL-2 production;<br>Increased number of T cells (offspring) | Wistar Rat         | [47]      |

Table S1. Cont.

|                                                                                                                                                                                                                        | Experimental protocol               | Anti-inflammatory activity and/or mechanism                                                                                                                                             | Animal tested | Reference |
|------------------------------------------------------------------------------------------------------------------------------------------------------------------------------------------------------------------------|-------------------------------------|-----------------------------------------------------------------------------------------------------------------------------------------------------------------------------------------|---------------|-----------|
| 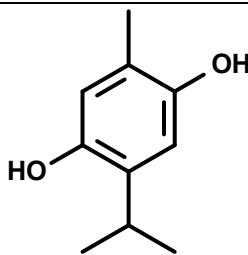<br><b>Thymohydroquinone</b>                                                                                                          | COX-1 and COX-2 assays              | Modulatory response;<br>Reduced COX-1 and COX-2 expression                                                                                                                              |               | [48]      |
| 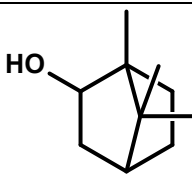<br><b>Borneol</b><br><br>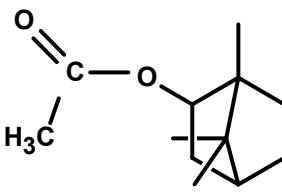<br><b>Bornyl acetate</b> | Type I allergic reaction            | Reduced histamine release                                                                                                                                                               | Rat mast cell | [50]      |
|                                                                                                                                                                                                                        | Focal cerebral ischemia reperfusion | Reduced ICAM-I, TNF- $\alpha$ and IL-1 $\beta$ production;<br>Reduced number of neutrophils                                                                                             | Rat           | [53]      |
|                                                                                                                                                                                                                        | TNBA-induced colitis                | Reduced IL-6 and IL-1 $\beta$ mRNA expression                                                                                                                                           | Mice          | [49]      |
|                                                                                                                                                                                                                        | LPS-induced abortion                | Anti-abortion effect;<br>Reduced number of CD4 and T lymphocytes, macrophages;<br>Reduced rate of CD4+/CD8+;<br>Increased IL-10 production;<br>Reduced IFN $\gamma$ and IL-4 production | Mice          | [57–59]   |

Table S1. Cont.

|                                                                                                       | Experimental protocol                                          | Anti-inflammatory activity and/or mechanism                                                                                                            | Animal tested                                                | Reference |
|-------------------------------------------------------------------------------------------------------|----------------------------------------------------------------|--------------------------------------------------------------------------------------------------------------------------------------------------------|--------------------------------------------------------------|-----------|
| 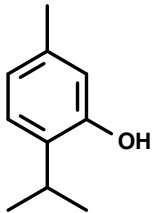<br><b>Thymol</b>    | fMLP-stimulated neutrophils                                    | Reduced release of elastase;<br>Calcium channel inactivation                                                                                           | Human                                                        | [60]      |
|                                                                                                       | Carrageenan-induced paw edema; Carrageenan-induced peritonitis | Reduced paw edema;<br>Reduced MPO activity;<br>Reduced leukocyte influx                                                                                | Rat and mice                                                 | [63]      |
| 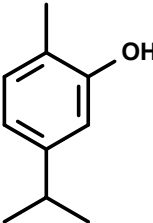<br><b>Carvacrol</b> | Cell-based transfection assays                                 | Suppression of Cox-2 expression; Activation of PPAR $\alpha$ and $\gamma$                                                                              | Bovine arterial endothelial cells                            | [70]      |
|                                                                                                       | LPS-induced COX-2 expression                                   | Inhibition of COX-2 mRNA                                                                                                                               | Human macrophage-like U937 cells                             | [70]      |
|                                                                                                       | Stress protein expression (T cell specific)                    | Immunoregulation;<br>Amplified T cell response to Hsp 70;<br>Promotion of T cell recognition of Hsp 70;<br>Increased number of CD4+CD25+FoxP3+ T cells | Mice:<br>Peyer's patches;<br>Hsp70-specific T cell hybridoma | [67]      |

Table S1. Cont.

|                                                                                                       | Experimental protocol                                                                                                                      | Anti-inflammatory activity and/or mechanism                                                 | Animal tested                           | Reference |
|-------------------------------------------------------------------------------------------------------|--------------------------------------------------------------------------------------------------------------------------------------------|---------------------------------------------------------------------------------------------|-----------------------------------------|-----------|
| 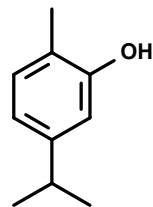<br><b>Carvacrol</b> | High-fat diet                                                                                                                              | Attenuation of pro-inflammatory cytokines; Inhibition of TLR2 and TLR4-mediated signaling   | C57BL/6N mice (visceral adipose tissue) | [71]      |
|                                                                                                       | Blood lymphocytes                                                                                                                          | Inhibition of lymphocyte proliferation;<br>Annexin-V binding and caspase-3 activation       | Porcine                                 | [72]      |
|                                                                                                       | Carrageenan-induced pleurisy and paw edema;<br>LPS-induced nitric production                                                               | Suppressed recruitment of leukocytes;<br>Reduced TNF- $\alpha$ level and nitrite production | Mice;<br>Murine macrophages             | [73]      |
|                                                                                                       | Histamine, dextran and substance P-induced paw edema;<br>TPA and arachidonic acid-induced ear edema;<br>Acetic acid-induced gastric lesion | Reduced paw and ear edema;<br>Reduced gastric lesion                                        | Rat and mice                            | [75]      |

Table S1. Cont.

|                                                                                                          | Experimental protocol         | Anti-inflammatory activity and/or mechanism       | Animal tested | Reference |
|----------------------------------------------------------------------------------------------------------|-------------------------------|---------------------------------------------------|---------------|-----------|
| 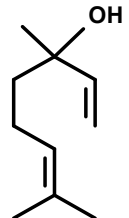<br><b>Linalool</b>     | CFA-induced edema             | Reduced mechanical hypersensitivity and paw edema | Mice          | [76]      |
|                                                                                                          | Carrageenan-induced paw edema | Reduced paw edema                                 | Wistar rat    | [77]      |
| 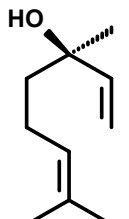<br><b>(-)-Linalool</b> | Carrageenan-induced paw edema | Reduced paw edema                                 | Wistar rat    | [77]      |
| 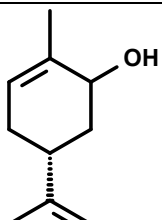<br><b>Carveol</b>     | COX-2 assay                   | Inhibition of COX-2 activity                      | Ovine         | [78]      |

Table S1. Cont.

|                                                                                                                                                                                                                           | Experimental protocol                                                         | Anti-inflammatory activity and/or mechanism                                                                                                                                                 | Animal tested        | Reference |
|---------------------------------------------------------------------------------------------------------------------------------------------------------------------------------------------------------------------------|-------------------------------------------------------------------------------|---------------------------------------------------------------------------------------------------------------------------------------------------------------------------------------------|----------------------|-----------|
| 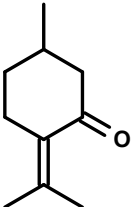<br><b>Pulegone</b>                                                                                                                      | COX-2 assay                                                                   | Inhibition of COX-2 activity                                                                                                                                                                | Ovine                | [78]      |
| 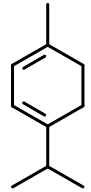<br><b>α-Terpinene</b><br><br>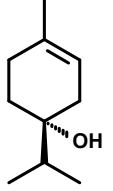<br><b>Terpinene-4-ol</b> | COX-2 assay                                                                   | Inhibition of COX-2 activity                                                                                                                                                                | Ovine                | [78]      |
|                                                                                                                                                                                                                           | Induced ear edema                                                             | Inhibited edema formation                                                                                                                                                                   | Rats                 | [79]      |
|                                                                                                                                                                                                                           | COX-2 assay                                                                   | Inhibition of COX-2 activity                                                                                                                                                                | Ovine                | [78]      |
|                                                                                                                                                                                                                           | LPS-activated peripheral blood monocytes                                      | Reduced TNF-α, IL-1β, IL-8 and PGE2 production                                                                                                                                              | Human                | [80]      |
| 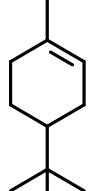<br><b>α-Terpineol</b>                                                                                                                 | <i>Gardnerella vaginalis</i> - induced vaginosis;<br>Vulvovaginal candidiasis | Reduced number of <i>G. vaginalis</i> and <i>Candida albicans</i> ;<br>Reduced MPO activity;<br>Reduced TNF-α, IL-1β, IL-6, COX-2, iNOS and NF-kB activation;<br>Increased IL-10 expression | Mice                 | [27]      |
|                                                                                                                                                                                                                           | COX-2 assay                                                                   | Inhibition of COX-2 activity                                                                                                                                                                | Ovine                | [78]      |
|                                                                                                                                                                                                                           | Epithelial buccal cells                                                       | Suppressed IL-6 production;<br>Increased IL-10 production                                                                                                                                   | Human;<br>macrophage | [103]     |

Table S1. Cont.

|                                                                                                          | Experimental protocol                                               | Anti-inflammatory activity and/or mechanism                                                                                                 | Animal tested                | Reference |
|----------------------------------------------------------------------------------------------------------|---------------------------------------------------------------------|---------------------------------------------------------------------------------------------------------------------------------------------|------------------------------|-----------|
| 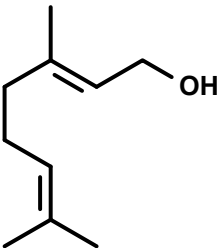<br><b>Geraniol</b>     | Lymphocyte proliferation assay; Cardiac allograft transplant model  | Inhibition of lymphocyte proliferation; Prolonged graft survival                                                                            | Rat                          | [81]      |
|                                                                                                          | Bacterial-induced inflammation                                      | Reduced levels of inflammatory markers                                                                                                      | Raw 264.7 macrophages        | [82,83]   |
|                                                                                                          | LPS-induced NO and PGE2 production;<br>LPS-induced COX-2 expression | Reduced iNOS mRNA expression;<br>Reduced iNOS enzymatic activity;<br>Reduced COX-2 mRNA expression;<br>Activated PPAR $\alpha$ and $\gamma$ | Raw 264.7 macrophages        | [84,85]   |
|                                                                                                          | Neutrophil activation                                               | Reduced TNF- $\alpha$ -induced neutrophil adherence                                                                                         | Human                        | [87]      |
|                                                                                                          | LPS-induced NO production                                           | Suppressed NO synthesis                                                                                                                     | Murine raw 264.7 macrophages | [88]      |
| 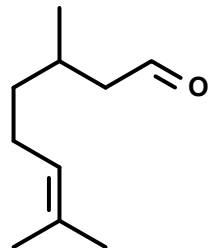<br><b>Citronellal</b> | LPS-induced NO and PGE2 production;<br>LPS-induced COX-2 expression | Reduced iNOS mRNA expression;<br>Reduced iNOS enzymatic activity; Reduced COX-2 mRNA expression;<br>Activated PPAR $\alpha$ and $\gamma$    | Raw 264.7 macrophages        | [84,85]   |
|                                                                                                          | LPS-induced NO production                                           | Suppressed NO synthesis                                                                                                                     | Murine raw 264.7 macrophages | [88]      |

Table S1. Cont.

|                                                                                                              | Experimental protocol                                  | Anti-inflammatory activity and/or mechanism                                                     | Animal tested         | Reference |
|--------------------------------------------------------------------------------------------------------------|--------------------------------------------------------|-------------------------------------------------------------------------------------------------|-----------------------|-----------|
| 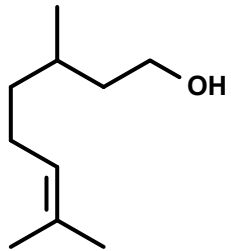<br><b>Citronellol</b>      | Neutrophil activation                                  | Reduced TNF- $\alpha$ -induced neutrophil adherence                                             | Human                 | [87]      |
| 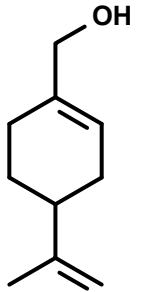<br><b>Perillyl alcohol</b> | DMBA-initiated and TPA-promoted skin tumorigenesis     | Inhibited ODC activity;<br>Reduced thymidine incorporation;<br>Inhibitor of RAS/Raf/ERK pathway | Mice                  | [91]      |
| 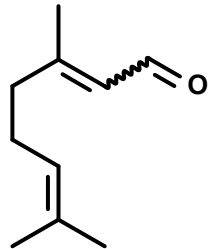<br><b>Citral</b>          | Neutrophil activation                                  | Reduced TNF- $\alpha$ -induced neutrophil adherence                                             | Human                 | [87]      |
|                                                                                                              | Paw edema ;<br>Carrageenan-induced leukocyte migration | Reduced paw edema and leukocyte migration                                                       | Rat                   | [95]      |
|                                                                                                              | LPS-induced NO production                              | Reduced NO production and iNOS expression;<br>Suppressed NF- $\kappa$ B activation              | Raw 264.7 macrophages | [96]      |

Table S1. Cont.

|                                                                                                      | Experimental protocol                      | Anti-inflammatory activity and/or mechanism                                                                                           | Animal tested         | Reference |
|------------------------------------------------------------------------------------------------------|--------------------------------------------|---------------------------------------------------------------------------------------------------------------------------------------|-----------------------|-----------|
| 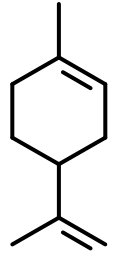<br><b>Limonene</b> | LPS-induced NO and PGE2 production         | Inhibited NO and PGE2 production;<br>Reduced iNOS and COX-2 expression;<br>Reduced TNF- $\alpha$ , IL-1 $\beta$ , and IL-6 production | Raw 264.7 macrophages | [97]      |
|                                                                                                      | Eosinophilic leukemia HL-60 clone 15 cells | Suppressed ROS production and chemotaxis in p38 MAPK;<br>Reduced MCP-1 production via NF- $\kappa$ B activation                       | Human                 | [98]      |
|                                                                                                      | LPS-induced pleurisy                       | Reduced cell migration                                                                                                                | Mice                  | [102]     |
|                                                                                                      | Epithelial buccal cells                    | Suppressed NO production;<br>Reduced IFN- $\gamma$ and IL-4 production;<br>Suppressed IL-6 production;<br>Increased IL-10 production  | Human;<br>macrophage  | [103]     |
| 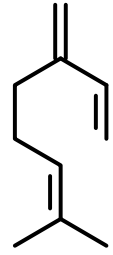<br><b>Myrcene</b> | LPS-induced pleurisy                       | Reduced cell migration;<br>Suppressed NO production;<br>Reduced IFN- $\gamma$ and IL-4 production                                     | Mice                  | [102]     |

Table S1. Cont.

|                                                                                                                 | Experimental protocol                       | Anti-inflammatory activity and/or mechanism                                             | Animal tested | Reference |
|-----------------------------------------------------------------------------------------------------------------|---------------------------------------------|-----------------------------------------------------------------------------------------|---------------|-----------|
| 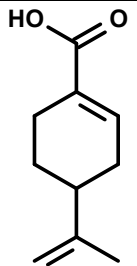 <p>Perillic acid</p>          | Immuno assays                               | Immunostimulatory activity;<br>Increased number of white blood cells and total antibody | Balb/c mice   | [105]     |
| 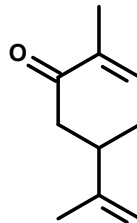 <p>Carvone</p>                | Immuno assays                               | Immunostimulatory activity;<br>Increased number of white blood cells and total antibody | Balb/c mice   | [105]     |
|                                                                                                                 | Neutrophil activation                       | Reduced TNF- $\alpha$ -induced neutrophil adherence                                     | Human         | [87]      |
| 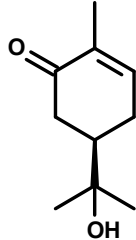 <p>Hydroxydihydrocarvone</p> | Carrageenan-induced paw edema; MPO activity | Reduced paw edema, MPO activity and neutrophil recruitment                              | Rat           | [106]     |

Table S1. Cont.

|                                                                                                                        | Experimental protocol            | Anti-inflammatory activity and/or mechanism            | Animal tested | Reference |
|------------------------------------------------------------------------------------------------------------------------|----------------------------------|--------------------------------------------------------|---------------|-----------|
| 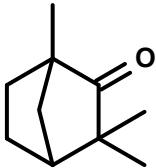<br><b>Fenchone</b>                   | Carrageenan-induced paw edema    | Reduced paw edema                                      | Rat           | [110]     |
| 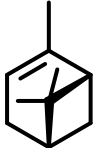<br><b><math>\alpha</math>-Pinene</b> | Carrageenan-induced paw edema    | Reduced paw edema;<br>Reduced mechanical sensitization | Mice          | [111]     |
| 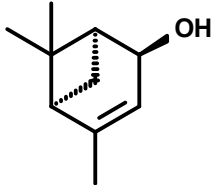<br><b>cis-Verbenol</b>               | Cerebral ischemic-induced injury | Reduced pro-inflammatory cytokines expression          | Rodent        | [112]     |
